# Supplementary material
Source: PubMed Central journal article supplement (PMC3418477)
Supplement: NIHMS381024-supplement-01.pdf [file NIHMS381024-supplement-01.pdf]

## SUPPLEMENTAL FIGURE LEGENDS

**Fig. S1. A (inset box),** The Complex I isolated from bovine heart contains up to 45 different subunits as analyzed by SDS-PAGE using 4-12% Bis-tris gel (MWM denotes molecular weight marker). **B,** Out of these 45 subunits, there are 14 highly conserved core subunits in the complex I from different species. There are 7 core subunits in the hydrophobic subcomplex. Based on the known protein crystal structures of the core subunits from *T. thermophilus* (hydrophilic domain, PDB ID: 3I9V) and *E. coli* (hydrophobic subcomplex, PDB ID: 3RKO), we have produced a model scheme showing the locations of 51 kDa and 75 kDa subunits in the core functional Complex I. 51 kDa subunit (in light cyan color) and 75 kDa subunit (in light green color) reside at the top of the core hydrophilic domain, which contains FMN cofactor (magenta sticks model) and iron-sulfur clusters (orange-yellow spheres model), and hosts the initial step of respiratory electron transfer activities.

**Fig. S2.** Amino acid sequence of the precursor of the complex I-75 kDa subunit. The regions labeled with bold represent the amino acid residues identified with LC/MS/MS under the non-reduced conditions in the absence of  $\beta$ -ME. The cysteinyl residues involved in S-glutathionylation are highlighted with gray and they are C<sub>226</sub>, C<sub>367</sub>, and C<sub>727</sub>. The cysteinyl residues involved in disulfide linkage are C<sub>554</sub>, and C<sub>564</sub>. The region labeled with a dotted underline is the N-terminal extension (aa 1-23), which acts as an import sequence and does not exist in the mature protein.

**Fig. S3. MS/MS spectra of the protonated molecular ions of S-glutathionylated peptides (a)** <sup>361</sup>VDADTLC<sup>367</sup>TEEVPTAGAGTDLR<sub>382</sub>, and **(b)** <sup>713</sup>AVTEGAHAVEEPSIC<sup>727</sup>.

**Fig. S4. Effect of complex I-mediated O<sub>2</sub><sup>•-</sup> generation on the ratio of GSH/GSSG (in A) and the enzymatic activity of complex I (in B) under the conditions of enzyme turnover in the presence of GSH.** The reaction mixture is as described in the legend of the Figure 1. The concentrations of GSH/GSSG and the enzymatic activity of complex I were measured after 1 h incubation at 37° C.

**Fig. S5.** Amino acid sequence of the precursor of the complex I-75 kDa subunit. The regions labeled with bold represent the amino acid residues identified with LC/MS/MS under the reduced conditions in the presence of  $\beta$ -ME. The cysteinyl residues involved in protein radical formation are underlined and they are C<sub>226</sub>, C<sub>554</sub>, and C<sub>727</sub>. The region labeled with a dotted underline is the N-terminal extension (aa 1-23), which acts as an import sequence and does not exist in the mature protein.

**Fig. S6. MS/MS spectrum of the triply protonated molecular ion of DMPO-binding peptide** <sup>544</sup>MLFLLGADGGC<sup>554</sup>ITR<sub>557</sub>.

**Fig. S7. MS/MS spectra of the doubly protonated molecular ions of S-sulfonated peptides. a,** <sup>713</sup>AVTEGAHAVEEPSIC(SO<sub>3</sub>)<sup>727</sup>. **b,** <sup>544</sup>M(ox)LFLLGADGGC<sup>554</sup>(SO<sub>3</sub>)ITR<sub>557</sub>.

**Fig. S8.** The homology model of 75 kDa (pale green) subunit of Complex I. FMN (magenta sticks) and iron-sulfur clusters (orange-yellow spheres) are also shown for orientation. There are total 17 highly conserved cysteines in mature mammal 75 kDa subunits. According to our multiple sequence alignment results (data not shown), 11 of the 17 cysteines are identical to the Nqo3 subunit of *T. thermophilus*, and directly involved in the coordinates or ligands of the iron-sulfur clusters, and they are highlighted with magenta sticks. The other 6 cysteines (C<sub>53</sub>, C<sub>367</sub>, C<sub>554</sub>, C<sub>564</sub>, C<sub>710</sub> and C<sub>727</sub>) are labeled and highlighted in blue-yellow spheres. Except C<sub>53</sub>, all other five active cysteines are surface exposed according to the homology model.

**Fig. S9.** The effect of different dosages of menadione (0-100  $\mu$ M) on the HL-1 cellular S-glutathionylation (in A) and protein radical adduct of DMPO (in B) measured by immunomicroscopic fluorescence using anti-GSH or anti-DMPO monoclonal antibody.

**Fig. S10.** Amino acid sequence coverage of the precursor of the 75 kDa subunit from the alkylated control complex I as analyzed by nano-LC/MS/MS. The regions labeled with *italic bold* and represent the amino acid

residues identified with LC/MS/MS under the non-reduced conditions in the absence of  $\beta$ -ME. The cysteinyl residues involved in disulfide bond are detected between *C*<sub>554</sub>, and *C*<sub>564</sub>. *Iodoacetamide alkylation was detected at all cysteine residues except C<sub>64</sub> and C<sub>710</sub> which were not observed by MS/MS.* The region labeled with a dotted underline is the N-terminal extension (aa 1-23), which acts as an import sequence and does not exist in the mature protein.

**A** Complex I (NQR)

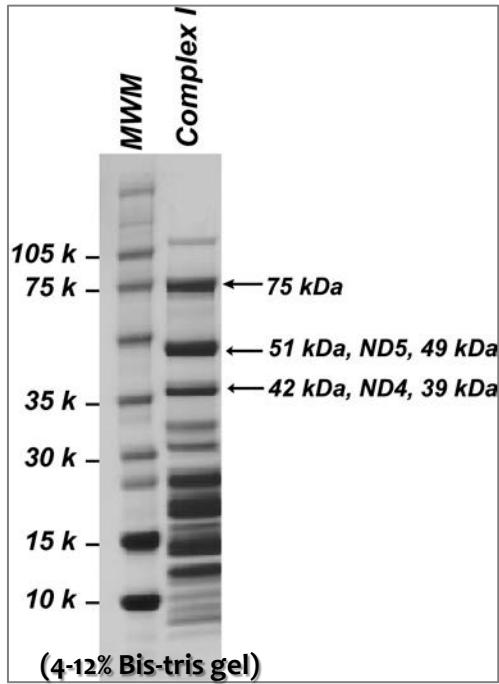

**B**

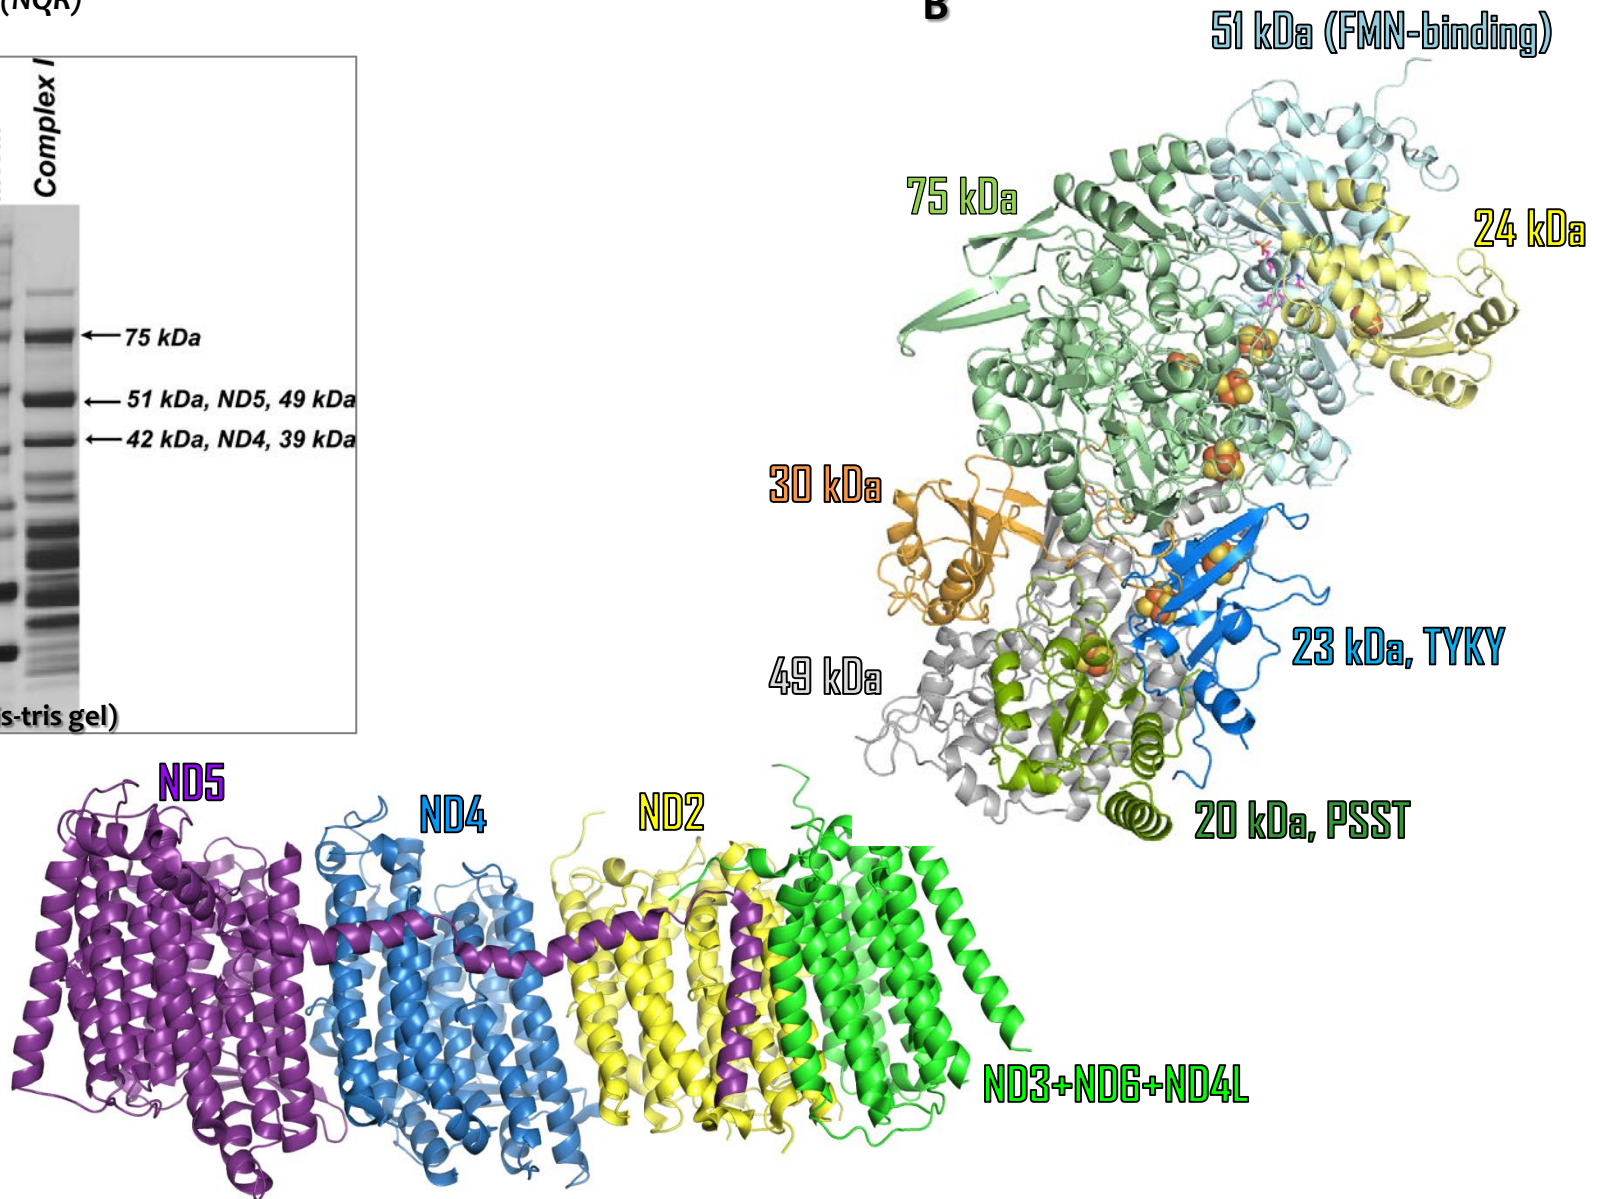

Supplemental Fig. S2

1 MLRIPVRKAL VGLSKSSKGC VRTTATAASN LIEVFVDGQS VMVEPGTTVL  
51 QACEKVGMOI PRFCYHERLS VAGNCRMCLV EIEKAPKVVA ACAMPVMKGW  
101 NILTNSEKTK KAREGVMEFL LANHPLDCPI CDQGGCEDLQ DQSMFSGSDR  
151 SRFLEGKRAV EDKNIGPLVK TIMTRCIQCT RCIRFASEIA GVDDLGGTTGR  
201 GNDMQVGTYYI EKMFMSSELSG NIIDI<sup>C</sup>CPVGA LTSKPYAFTA RPWETRKTES  
251 IDVMDAVGSN IVVSTRTGEV MRILPRMHED INEEWISDKT RFAYDGLKRQ  
301 RLTEPMVRNE KGLLTHTTWE DALSRVAGML QSFQGNVAA IAGGLVDAEA  
351 LIALKDLLNR VSDTL<sup>C</sup>CTEE VFPTAGAGTD LRSNYLLNTT IAGVEEADV  
401 LLVGTNPRFE APLFNARIRK SWLHNDLKVA LIGSPVDLTY RYDHLGDSPK  
451 ILQDIASGSH PFSQVLQEAK KPMVILGSSA LQRNDGAAIL AAVSNIAQKI  
501 RTSSGVTGDW KVMNILHRIA SQVAALDLGY KPGVEAIQKN PPKMLFLLGA  
551 DGGCITRQDL PKDCFIVYQG HGGDVGAPIA DVILPGAAYT EKSATYVNTE  
601 GRAQQTKVAV TPPGLAREDW KIIRALSEIA GMTLPYDTLD QVRNRLEEVS  
651 PNLVRYDDVE GANYFQQASE LSKLVNQQLL ADPLVPPQLT IKDFYMTDSI  
701 SRASQTMKAC VKAVTEGAHA VEEPSIC

Sequence coverage=511/704=72.58%

Supplemental Fig. S3a

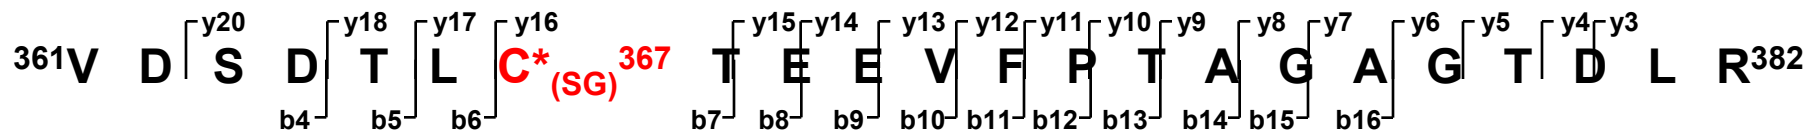

*m/z*=1301.85<sup>2+</sup>

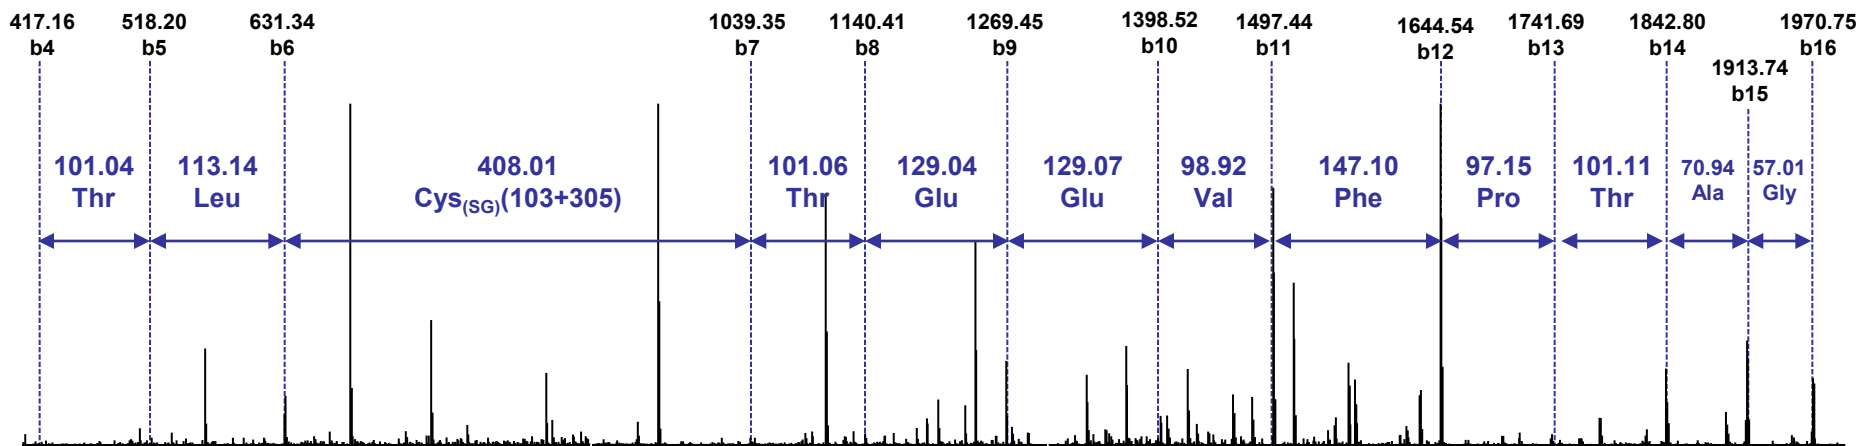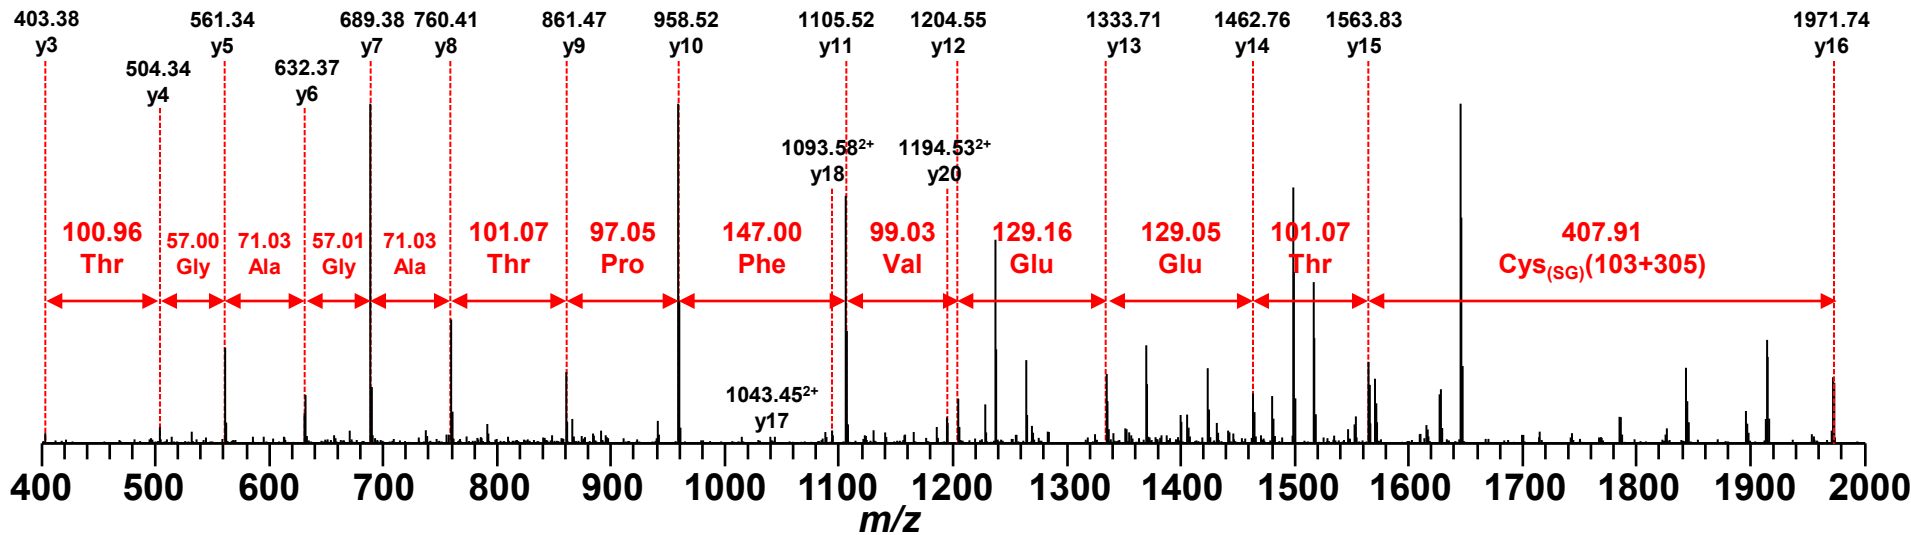

Supplemental Fig. S3b

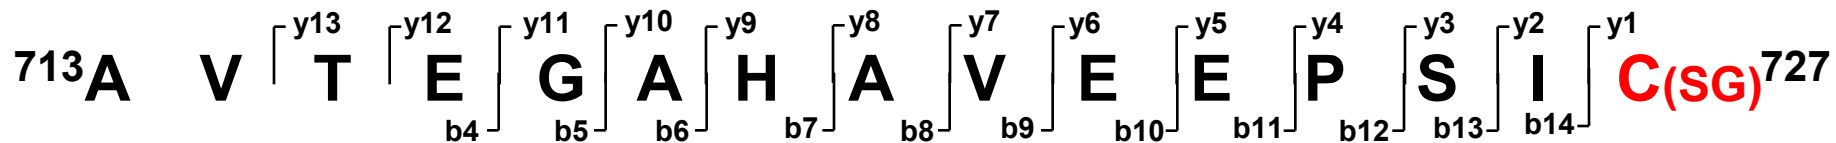

$m/z=607.01^{3+}$

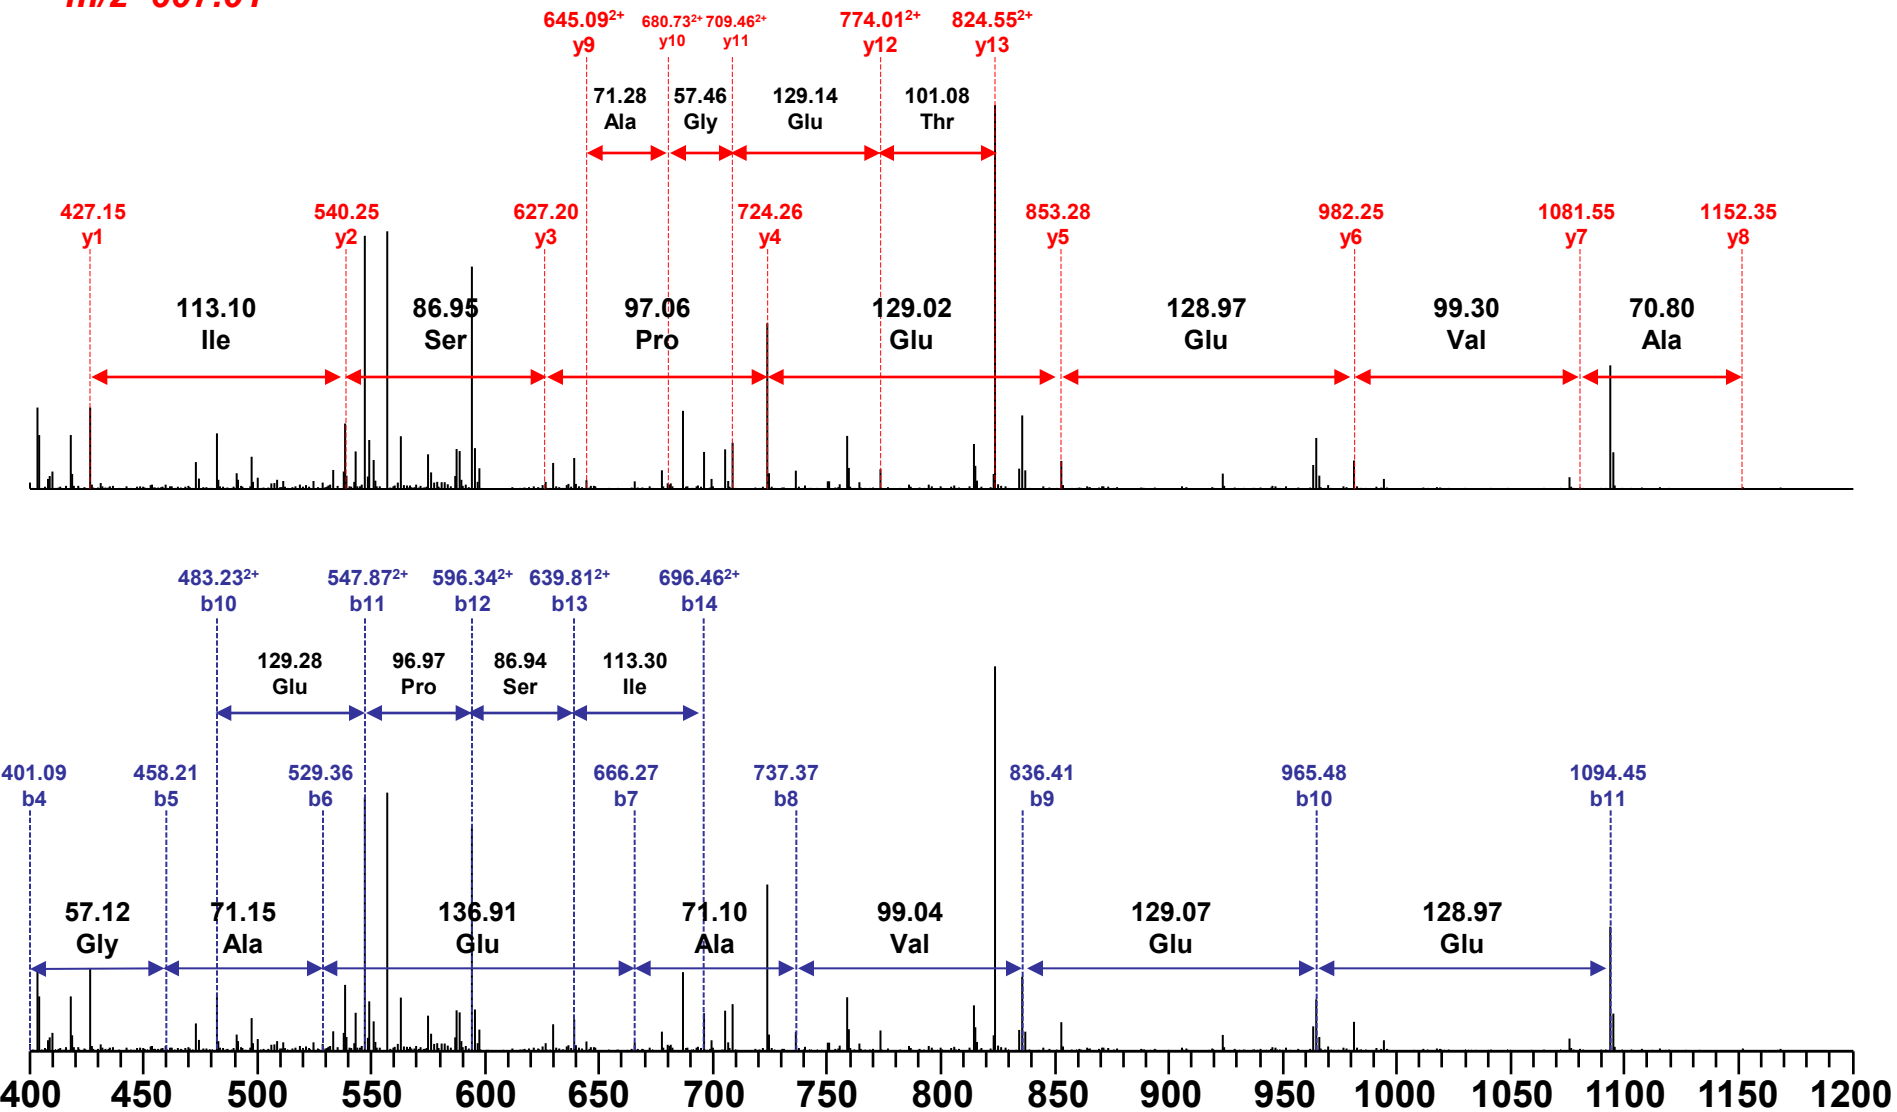

Supplemental Fig. S4

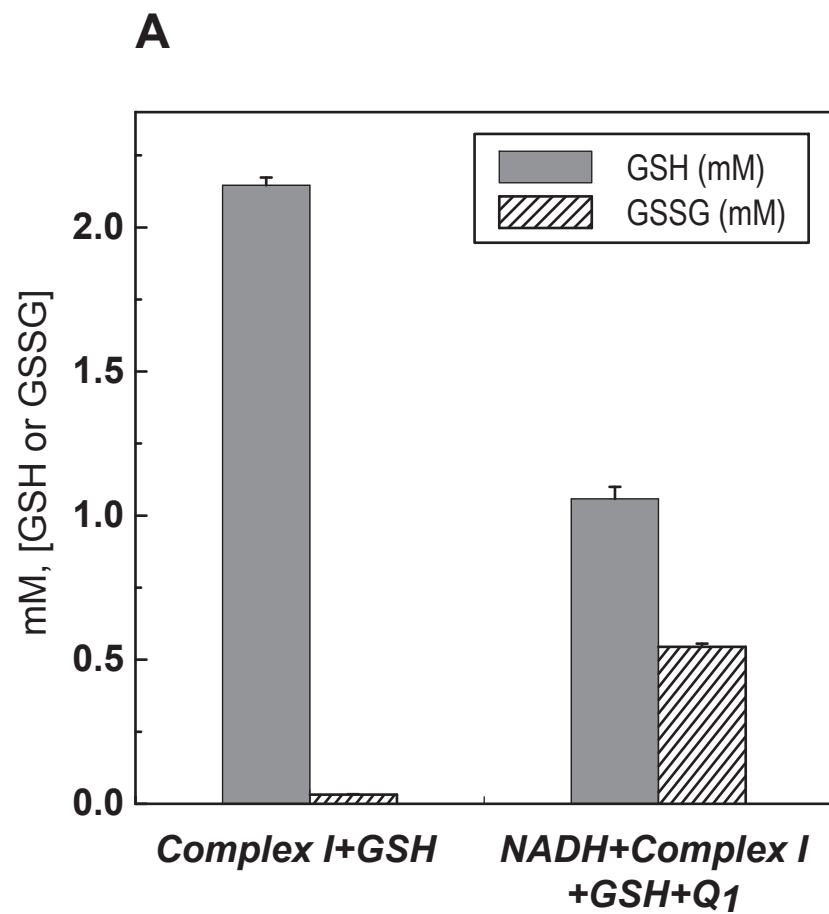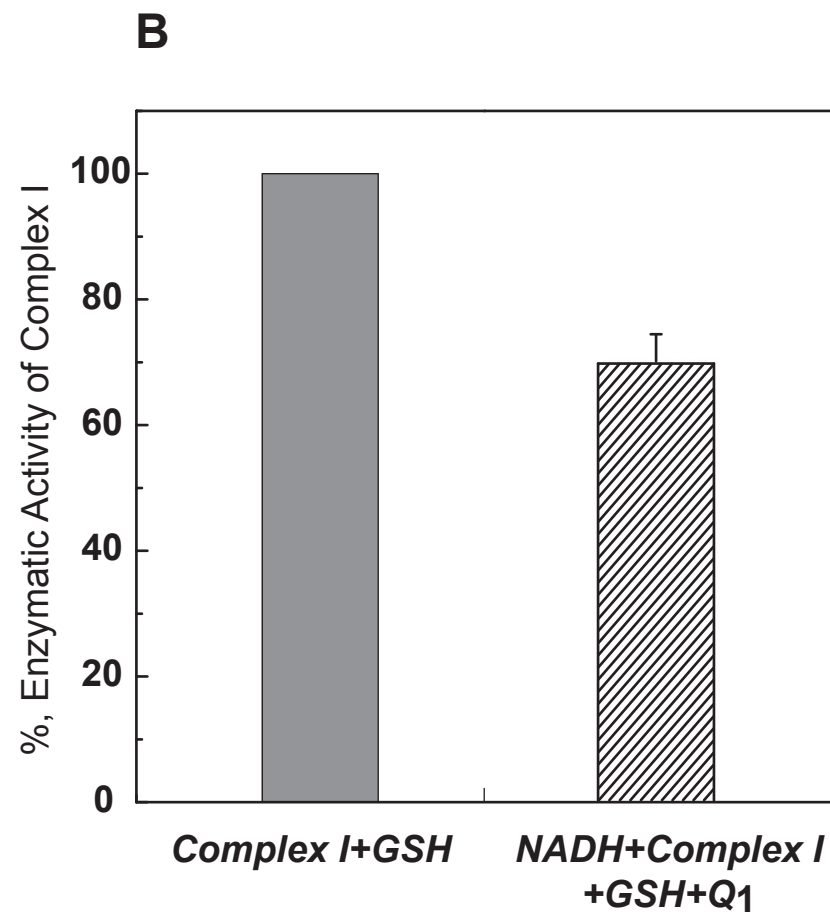

Supplemental Fig. S5

1 MLRIPVRKAL VGLSKSSKGC VRTTATAASN LIEVFVDGQS VMVEPGTTVL  
51 QACEKVGMI PRFCYHERLS VAGNCRMCLV EIEKAPKVVA ACAMPVMKGW  
101 NILTNSEKTK KAREGVMEFL LANHPLDCPI CDQGGECDLQ DQSMFSGSDR  
151 SRFLEGKRAV EDKNIGPLVK TIMTRCIQCT RCIRFASEIA GVDDLGGTGR  
201 GNDMQVGTYI EKMFMSSELSG NIIDICPVGA LTSKPYAFTA RPWETRKTES  
251 IDVMDAVGSN IVVSTRTGEV MRILPRMHED INEEWISDKT RFAYDGLKRQ  
301 RLTEPMVRNE KGLLTHTTWE DALSRVAGML QSFQGNVAA IAGGLVDAEA  
351 LIALKDLLNR VSDTLCTEE VFPTAGAGTD LRSNYLLNTT IAGVEEADV  
401 LLVGTNPRFE APLENARIRK SWLHNDLKVA LIGSPVDLTY RYDHLGDSPK  
451 ILQDIASGSH PFSQVLQEAK KPMVILGSSA LQRNDGAAIL AAVSNIAQKI  
501 RTSSGVTGDW KVMNILHRIA SQVAALDLGY KPGVEAIQKN PPKMLFLLGA  
551 DGGCITRQDL PKDCFIVYQG HHGDVGAPIA DVILPGAAYT EKSATYVNTE  
601 GRAQQTKVAV TPPGLAREDW KIIRALSEIA GMTLPYDTLD QVRNRLEEVS  
651 PNLVRYDDVE GANYFQQASE LSKLVNQQLL ADPLVPPQLT IKDFYMTDSI  
701 SRASQTMKC VKAVTEGAHA VEEPSIC

Sequence coverage=679/704 =96.44%



Supplemental Fig. S6

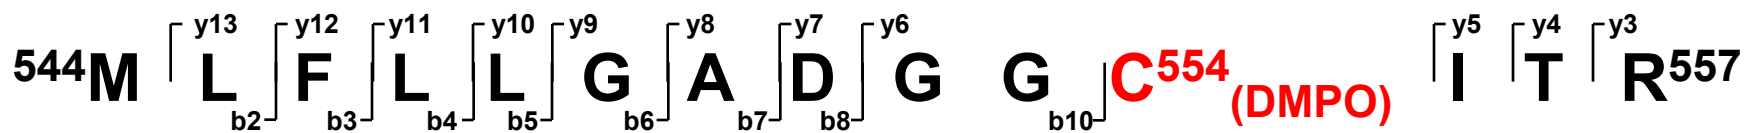

$m/z_{(theoretical)} = 526.6108^{3+}$

$m/z_{(measured)} = 527.03^{3+}$

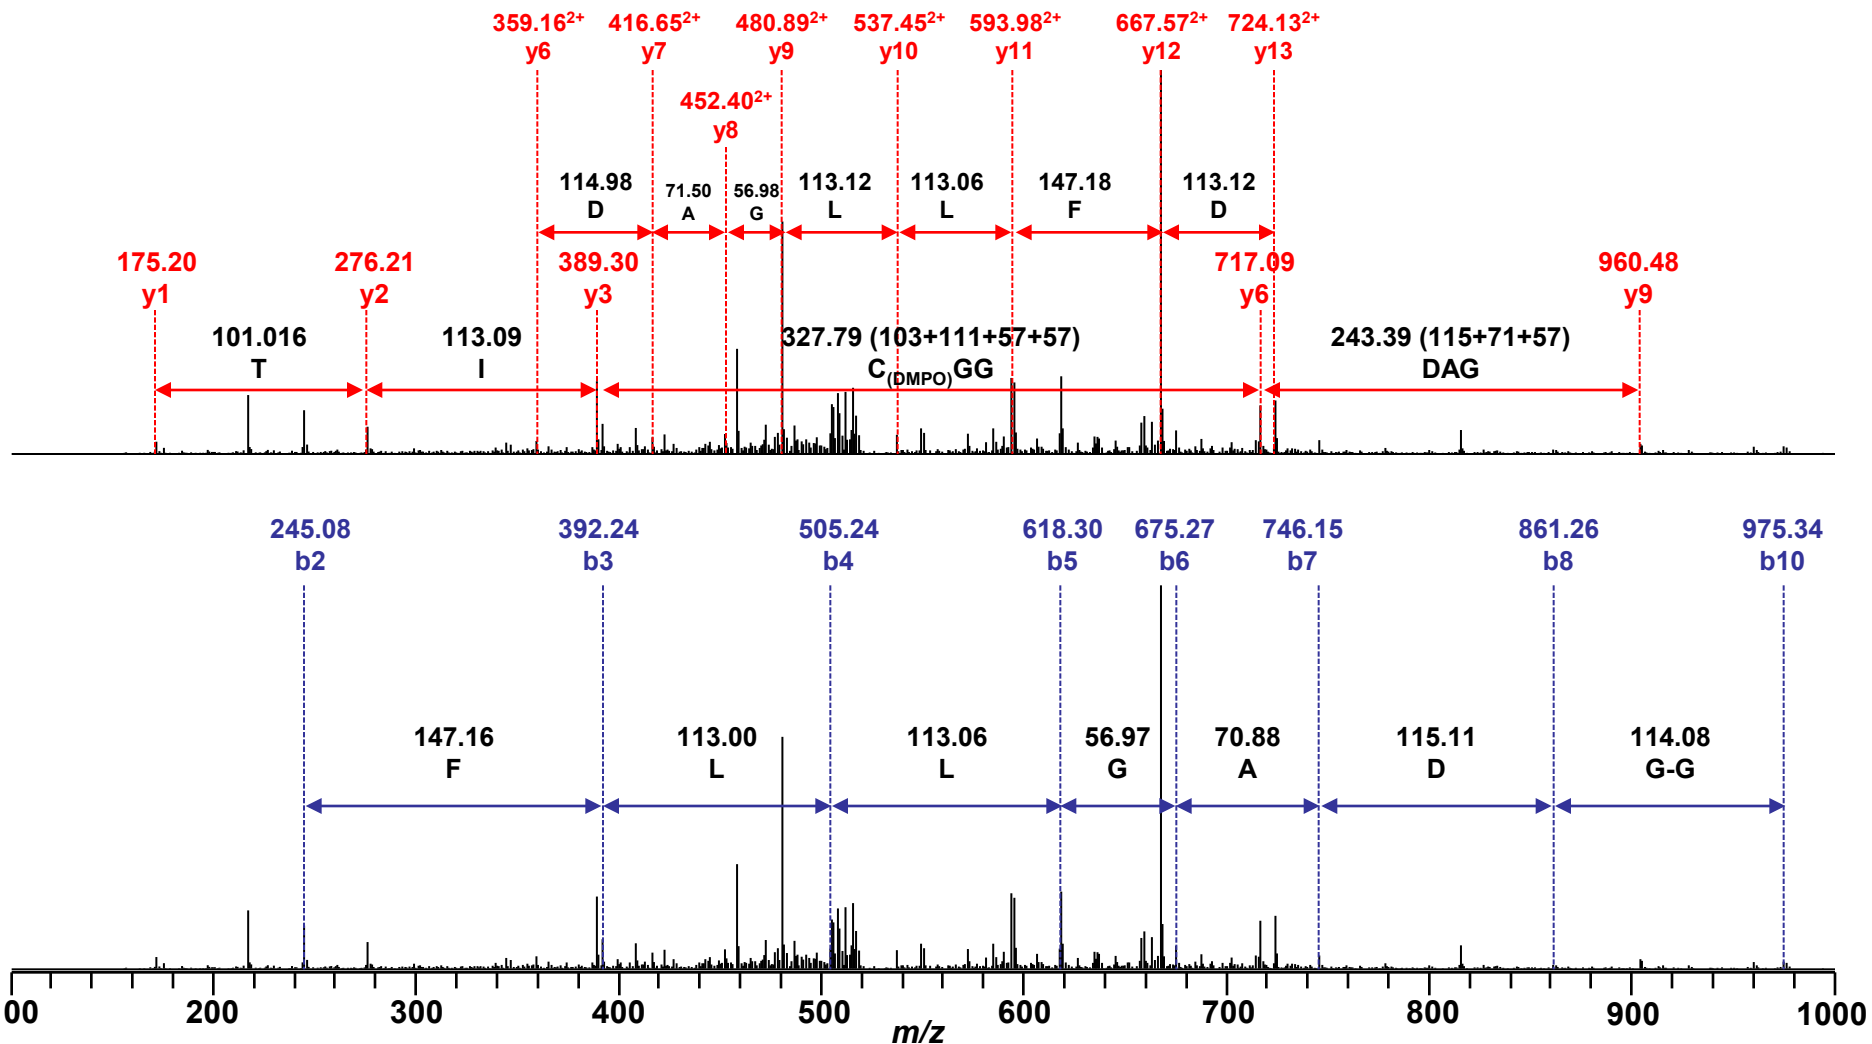

Supplemental Fig. S7a

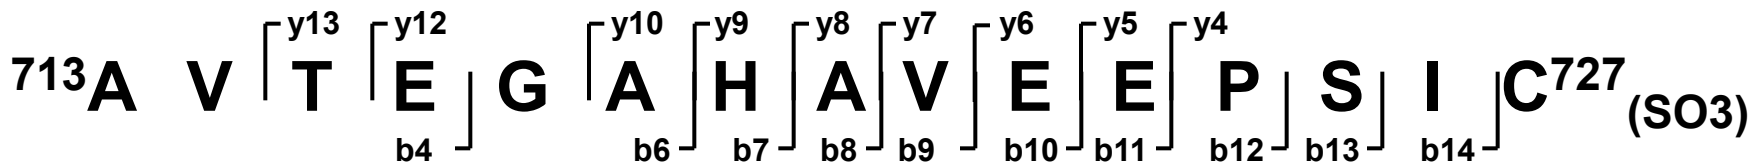

*m/z*=766.18<sup>2+</sup>

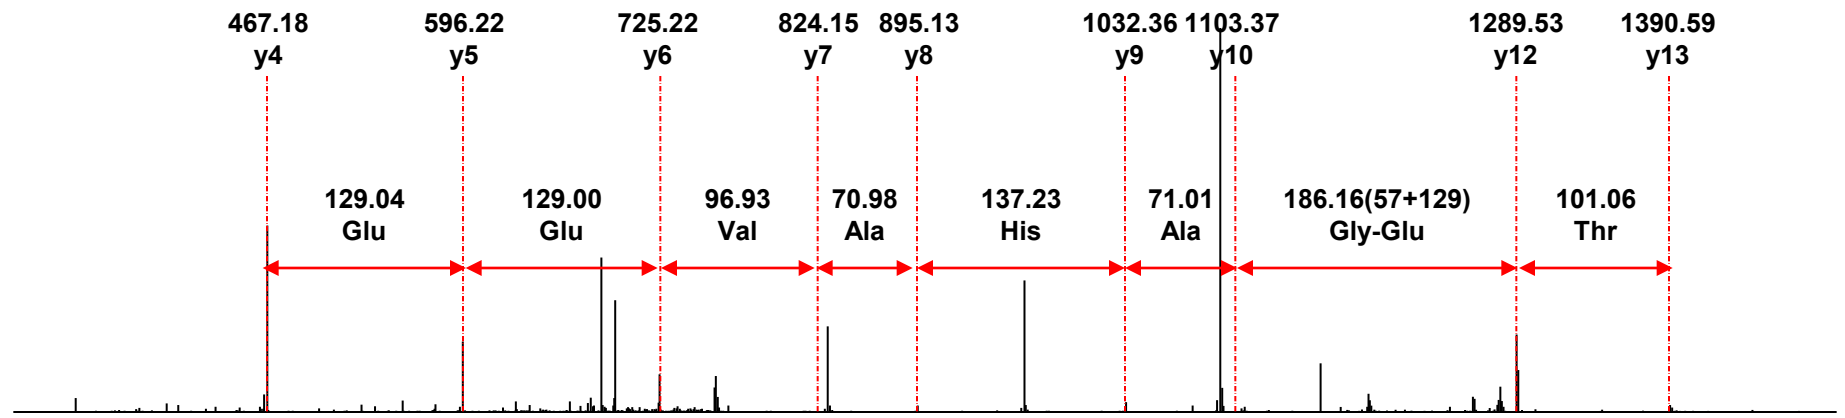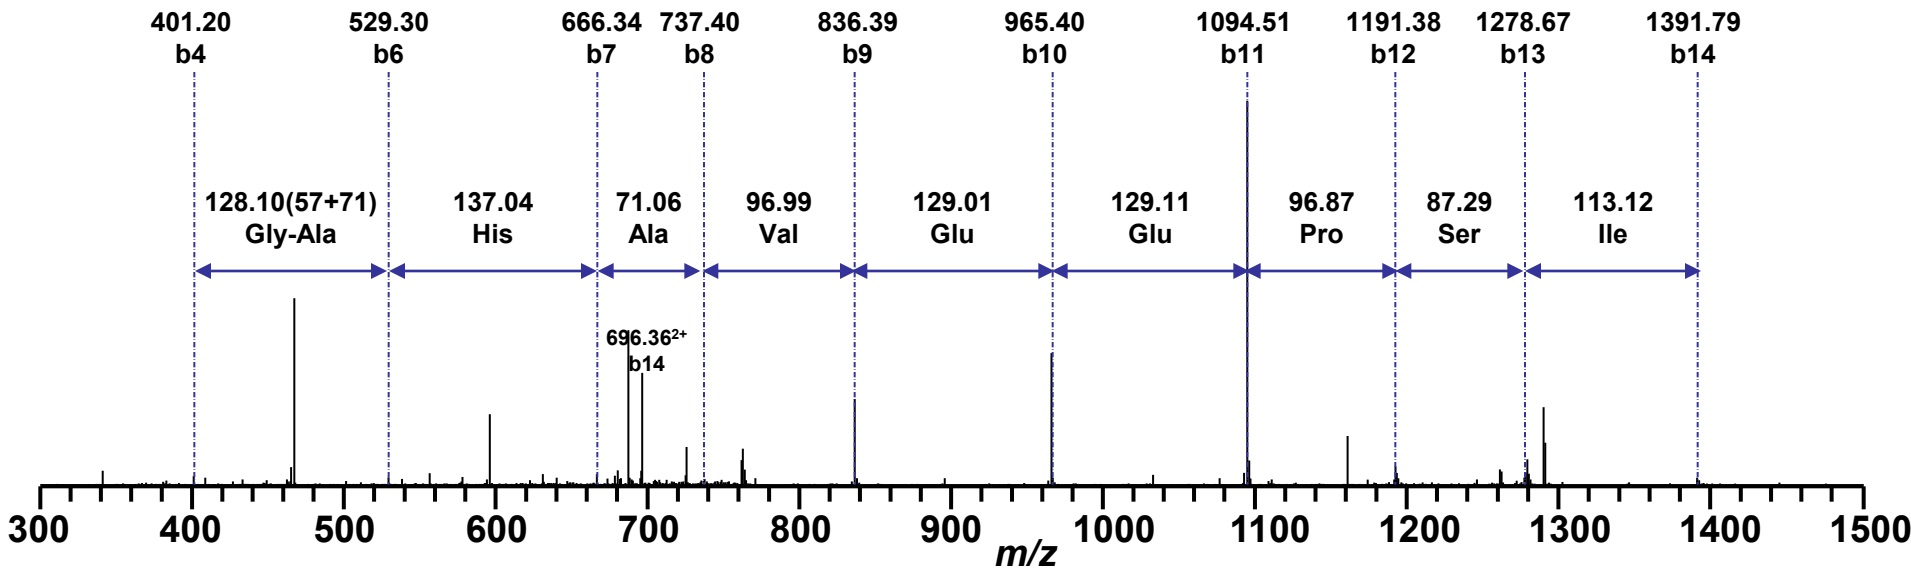

Supplemental Fig. S7b

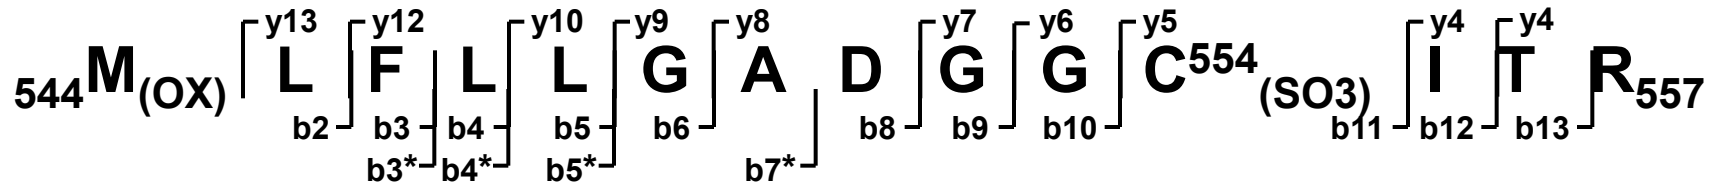

$m/z=780.83^{2+}$   
 $bn^*=bn-\text{CH}_4\text{SO}$

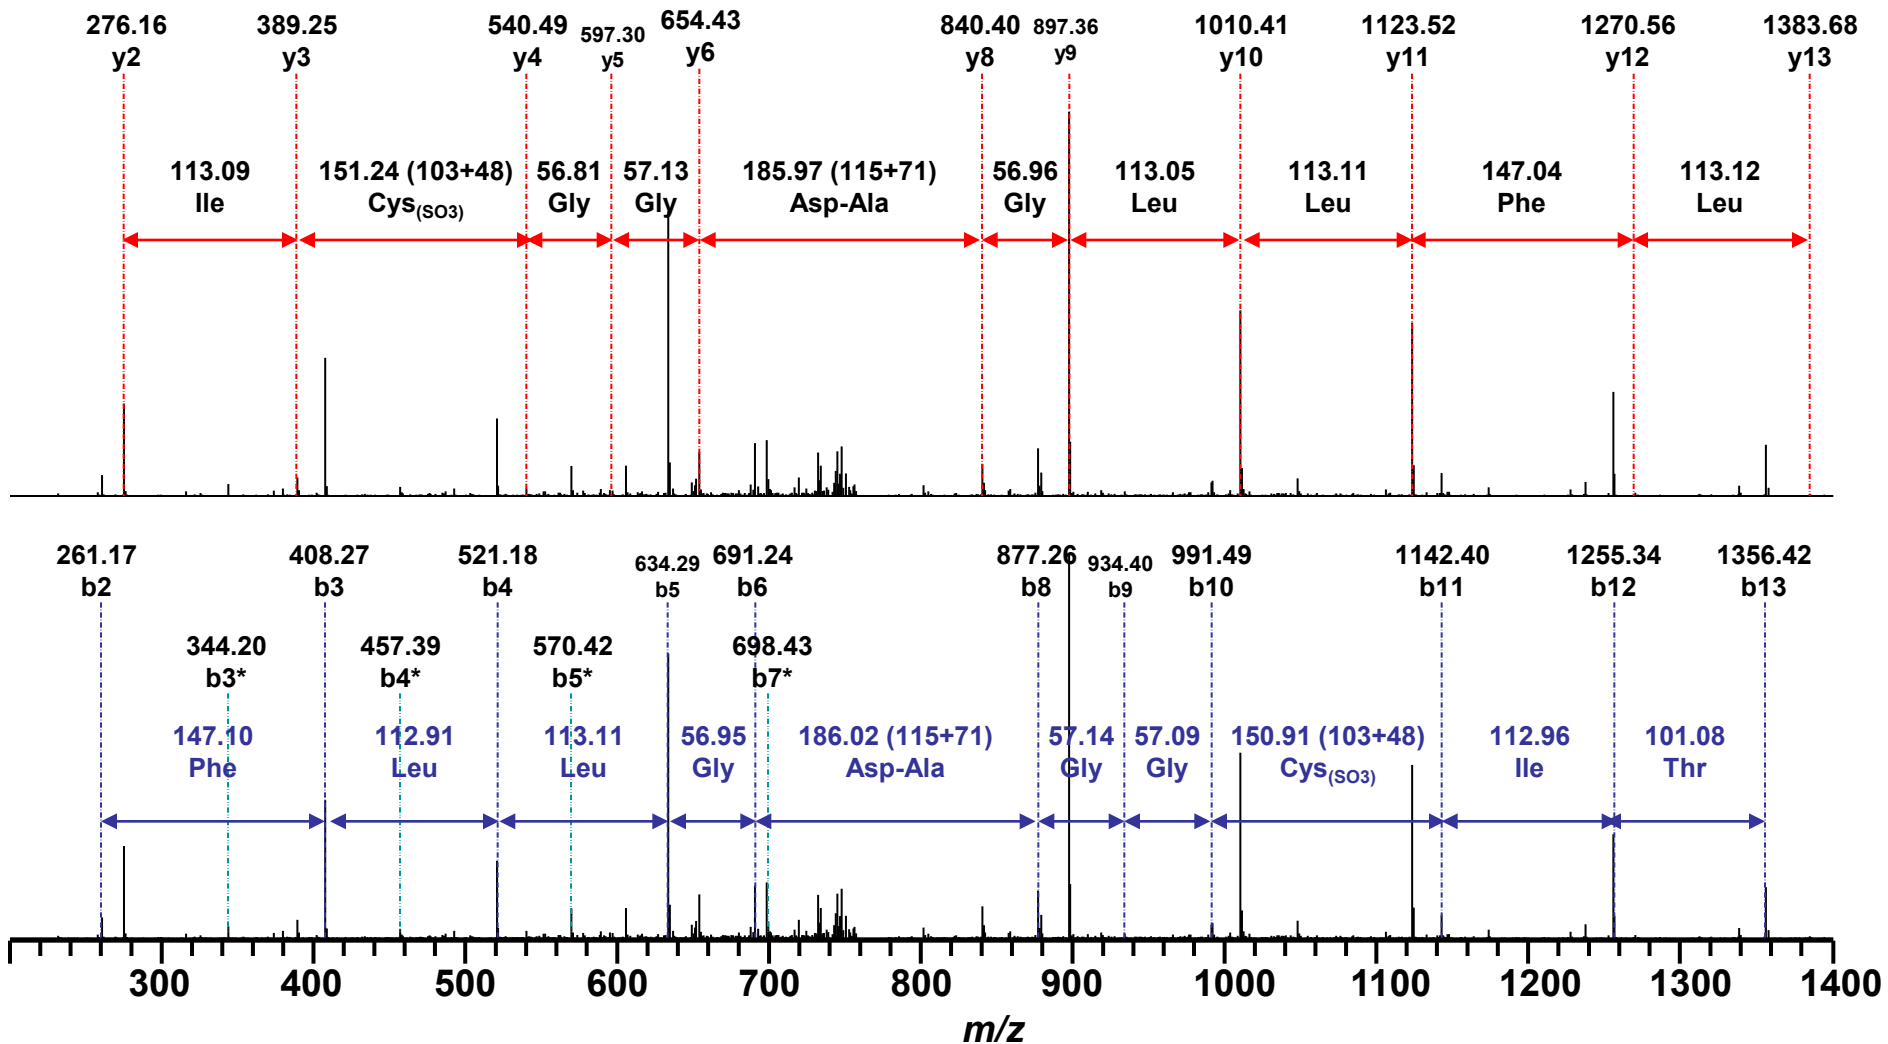

Supplemental Fig. 8S

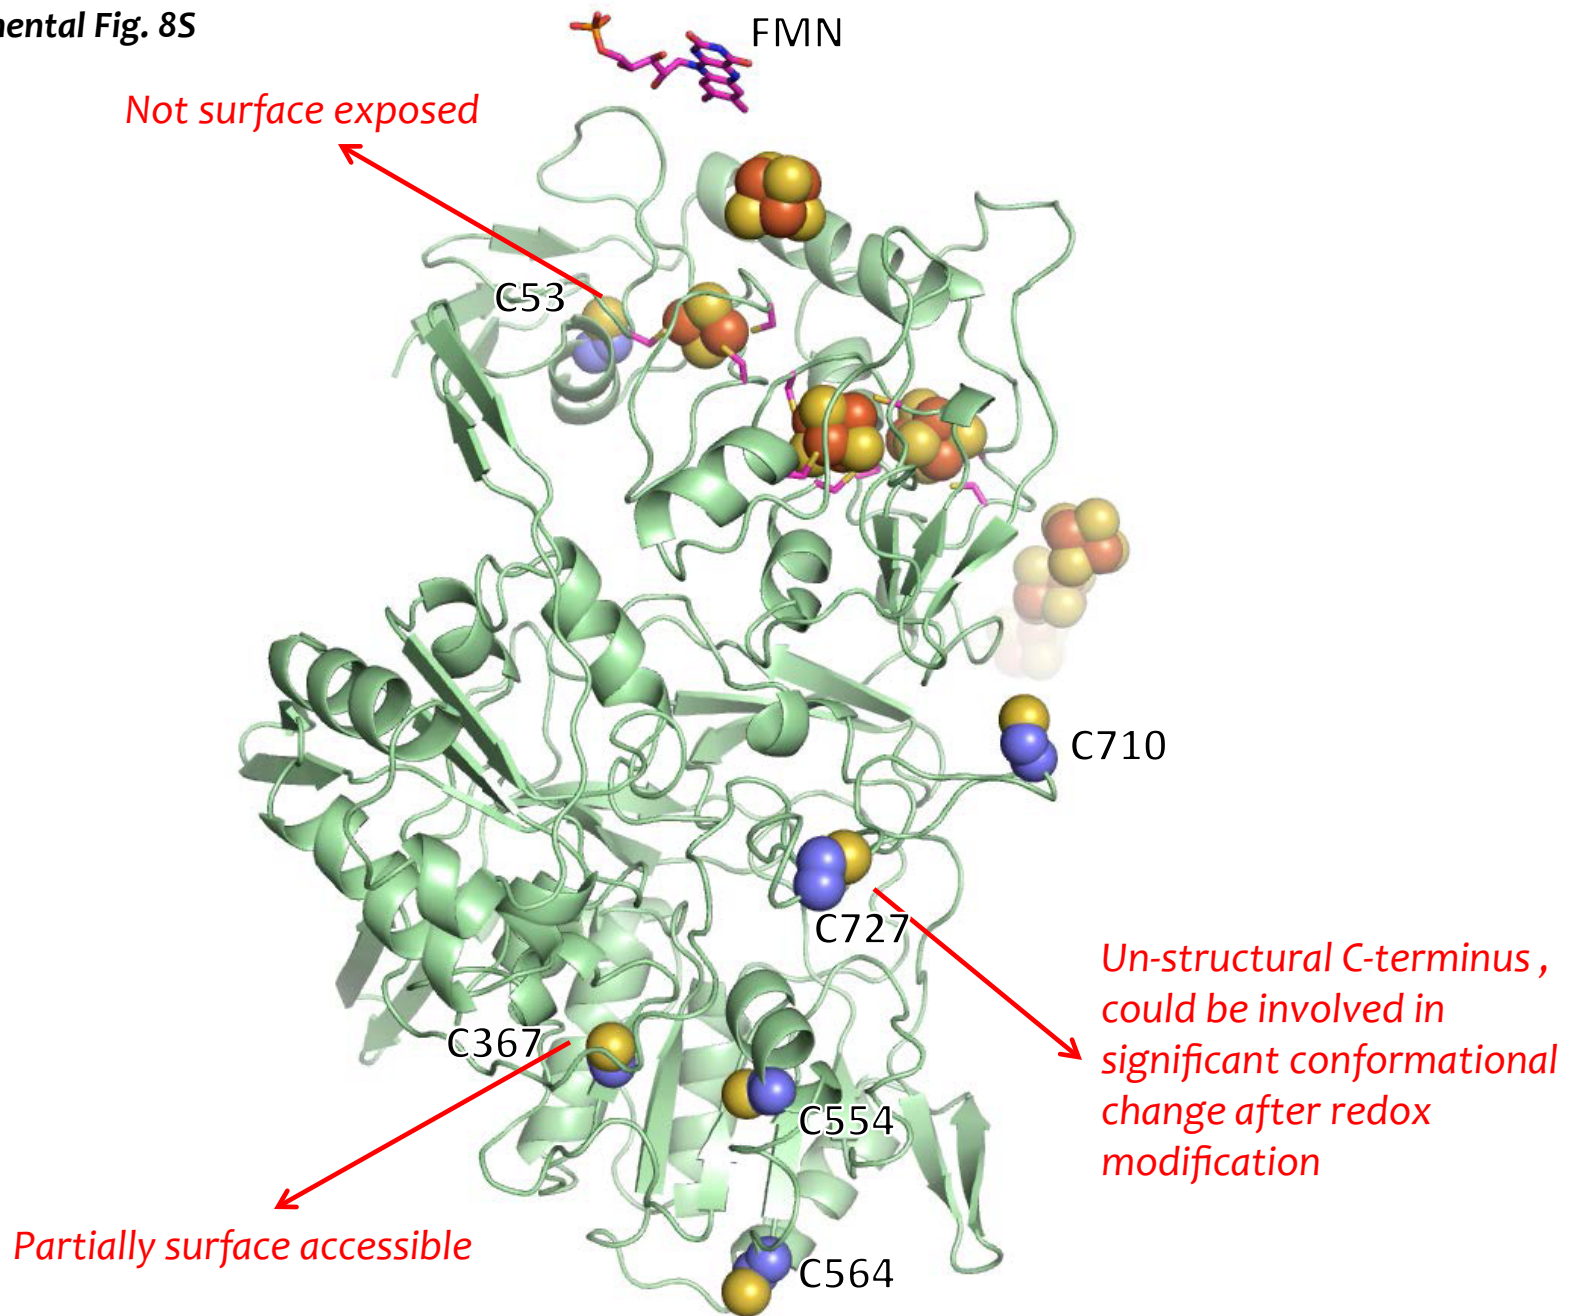

Supplemental Fig. S9

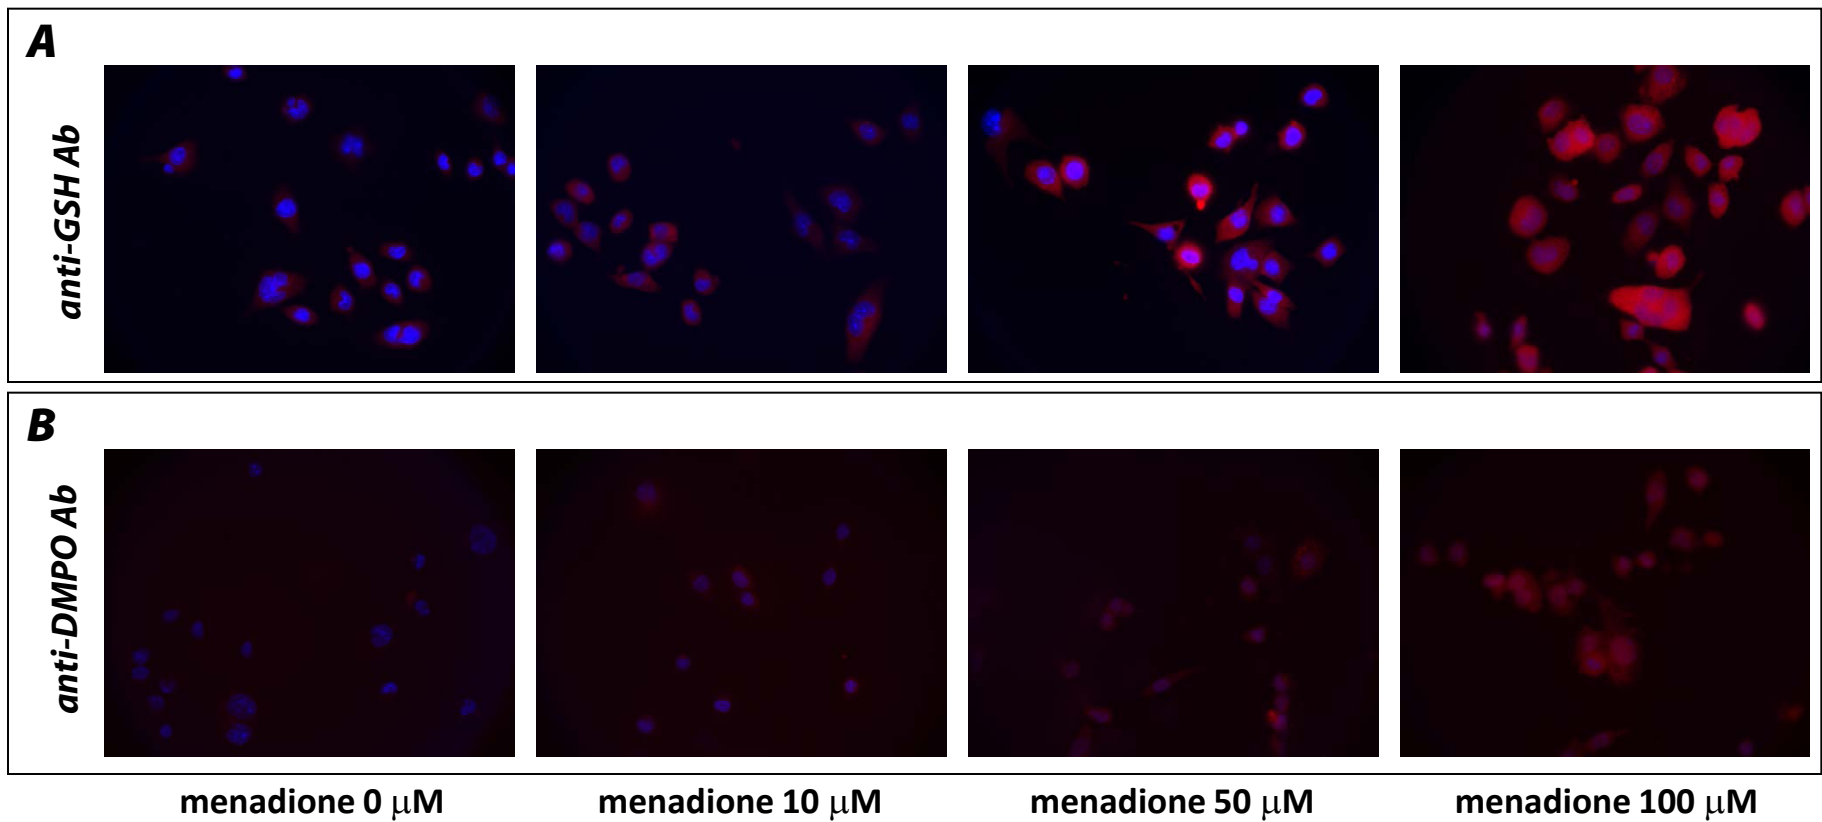

**Red: Alexa Fluor 594 -conjugated goat anti-mouse IgG**  
**Blue: DAPI staining of nuclear**

**Supplementary Fig. S10**

1 MLRIPVRKAL VGLSKSSKGC VRTTATAASN LIEVFVDGQS VMVEPGTTVL  
51 QACEKVGMQI PRFCYHERLS VAGNCRMCLV EIEKAPKVVA ACAMPVMKGW  
101 NILTNSEKTK KAREGVMEFL LANHPLDCPI CDQGGECDLQ DQSMMFGSDR  
151 SRFLEGKRAV EDKNIGPLVK TIMTRCIQCT RCIRFASEIA GVDDLGTTR  
201 GNDMQVGTYI EKMFMSLSG NIIDICPVGA LTSKPYAFTA RPWETRKTES  
251 IDVMDAVGSN IVVSTRTGEV MRILPRMHED INEEWISDKT RFAYDGLKRQ  
301 RLTEPMVRNE KGLLTHTTWE DALSRVAGML QSFQGNVAA IAGGLVDAEA  
351 LIALKDLLNR VSDTLCTEE VFPTAGAGTD LRSNYLLNTT IAGVEEADV  
401 LLVGTNPRFE APLFNARIRK SWLHNDLKVA LIGSPVDLTY RYDHLGDSPK  
451 ILQDIASGSH PFSQVLQEAQ KPMVILGSSA LQRNDGAAIL AAVSNIAQKI  
501 RTSSGVTGDW KVMNILHRIA SQVAALDLGY KPGVEAIQKN PPKMLFLLGA  
551 DGGCITRQDL PKDCFIVYQG HHGDVGAPIA DVILPGAAYT EKSATYVNTE  
601 GRAQTKVAV TPPGLAREDW KIIRALSEIA GMTLPYDTLD QVRNRLEEVS  
651 PNLVRYDDVE GANYFQQASE LSKLVNQQLL ADPLVPPQLT IKDFYMTDSI  
701 SRASQTMACK VKAVTEGAHA VEEPSIC

Sequence coverage = 634/704=90.05%

Supplementary Table

A. Detailed MS/MS map of  ${}_{544}\text{M}_{(\text{OX})}\text{LFLLGADGGC}_{(\text{SO}_2)}{}^{554}\text{ITR}_{557}$

| $\Delta m$ between $y_n$ and $y_{n-1}$ | Fragment Ion          | Measured $m/z$ | Sequence                              | Measured $m/z$ | Fragment Ion          | $\Delta m$ between $b_n$ and $b_{n-1}$ |
|----------------------------------------|-----------------------|----------------|---------------------------------------|----------------|-----------------------|----------------------------------------|
|                                        |                       |                | Met <sub>(OX)</sub>                   |                |                       |                                        |
|                                        |                       |                | Leu                                   | 261.02         | <b>b<sub>2</sub></b>  |                                        |
| 146.76                                 | <b>y<sub>12</sub></b> | 1254.59        | Phe                                   | 408.15         | <b>b<sub>3</sub></b>  | 147.13                                 |
| 113.36                                 | <b>y<sub>11</sub></b> | 1107.83        | Leu                                   | 521.28         | <b>b<sub>4</sub></b>  | 113.13                                 |
| 113.14                                 | <b>y<sub>10</sub></b> | 994.47         | Leu                                   | 634.27         | <b>b<sub>5</sub></b>  | 112.99                                 |
| 56.81                                  | <b>y<sub>9</sub></b>  | 881.33         | Gly                                   | 691.39         | <b>b<sub>6</sub></b>  | 57.12                                  |
| 186.2 (115+71)                         | <b>y<sub>8</sub></b>  | 824.52         | Ala                                   |                |                       |                                        |
|                                        |                       |                | Asp                                   | 877.41         | <b>b<sub>8</sub></b>  | 186.02 (71+115)                        |
| 56.88                                  | <b>y<sub>6</sub></b>  | 638.32         | Gly                                   | 934.33         | <b>b<sub>9</sub></b>  | 56.92                                  |
| 57.17                                  | <b>y<sub>5</sub></b>  | 581.44         | Gly                                   | 991.42         | <b>b<sub>10</sub></b> | 57.09                                  |
| <b>135 (103+32)</b>                    | <b>y<sub>4</sub></b>  | <b>524.27</b>  | <b>Cys<sub>(SO<sub>2</sub>)</sub></b> | <b>1126.41</b> | <b>b<sub>11</sub></b> | <b>134.99 (103+32)</b>                 |
| 113.19                                 | <b>y<sub>3</sub></b>  | 389.27         | Ile                                   | 1239.46        | <b>b<sub>12</sub></b> | 113.05                                 |
|                                        | <b>y<sub>2</sub></b>  | 276.08         | Thr                                   | 1340.80        | <b>b<sub>13</sub></b> |                                        |
|                                        |                       |                | Arg                                   |                |                       |                                        |

B. Detailed MS/MS map of  ${}^{713}\text{AVTEGAHAVEEPSIC}_{(\text{SO}_2)}{}^{727}$

| $\Delta m$ between $y_n$ and $y_{n-1}$ | Fragment Ion          | Measured $m/z$       | Sequence                              | Measured $m/z$       | Fragment Ion          | $\Delta m$ between $b_n$ and $b_{n-1}$ |
|----------------------------------------|-----------------------|----------------------|---------------------------------------|----------------------|-----------------------|----------------------------------------|
|                                        |                       |                      | Ala                                   |                      |                       |                                        |
|                                        |                       |                      | Val                                   |                      |                       |                                        |
| 99.82                                  | <b>y<sub>13</sub></b> | 687.50 <sup>+2</sup> | Thr                                   | 272.26               | <b>b<sub>3</sub></b>  |                                        |
| 128.98                                 | <b>y<sub>12</sub></b> | 637.59 <sup>+2</sup> | Glu                                   | 401.22               | <b>b<sub>4</sub></b>  | 128.96                                 |
| 57.78                                  | <b>y<sub>11</sub></b> | 573.13 <sup>+2</sup> | Gly                                   | 458.61               | <b>b<sub>5</sub></b>  | 57.39                                  |
| 71.11                                  | <b>y<sub>10</sub></b> | 1087.48              | Ala                                   | 529.29               | <b>b<sub>6</sub></b>  | 70.68                                  |
| 137.08                                 | <b>y<sub>9</sub></b>  | 1016.37              | His                                   | 666.41               | <b>b<sub>7</sub></b>  | 137.12                                 |
| 70.75                                  | <b>y<sub>8</sub></b>  | 879.29               | Ala                                   |                      |                       |                                        |
| 99.23                                  | <b>y<sub>7</sub></b>  | 808.54               | Val                                   | 836.44               | <b>b<sub>9</sub></b>  | 170.03 (71+99)                         |
| 129.07                                 | <b>y<sub>6</sub></b>  | 709.31               | Glu                                   | 965.40               | <b>b<sub>10</sub></b> | 128.96                                 |
| 129.01                                 | <b>y<sub>5</sub></b>  | 580.24               | Glu                                   | 1094.48              | <b>b<sub>11</sub></b> | 129.08                                 |
|                                        | <b>y<sub>4</sub></b>  | 451.23               | Pro                                   | 1191.53              | <b>b<sub>12</sub></b> | 97.05                                  |
|                                        |                       |                      | Ser                                   | 1278.58              | <b>b<sub>13</sub></b> | 113.28                                 |
|                                        |                       |                      | Ile                                   | 696.43 <sup>+2</sup> | <b>b<sub>14</sub></b> |                                        |
|                                        |                       |                      | <b>Cys<sub>(SO<sub>2</sub>)</sub></b> |                      |                       |                                        |
